# Supplementary material
Source: ML conference proceedings conference paper supplement (https://proceedings.mlr.press/v139/fang21a.html)
Supplement: Supplementary file [file fang21a-supp.pdf]

---

# Supplementary Material for “On Estimation in Latent Variable Models”

---

Guanhua Fang, Ping Li  
Cognitive Computing Lab  
Baidu Research  
10900 NE 8th St Bellevue WA 98004 USA  
{guanhuafang, liping11}@baidu.com

**Summary** In this supplementary file, we collect the technical proofs for results stated in the main paper. Throughout the sequel, we will adopt the following notations. We let  $\theta$  denote the generic model parameter. We also let  $Y$  be a random variable representing the observed data and  $Z$  be a random variable representing the latent unobserved variable. We use  $y$  and  $z$  to denote their realizations, respectively. Subscript  $i$  is used to indicate the  $i$ -th individual. We use  $\|x\|$  and  $\|x\|_1$  to represent  $\ell_2$ - and  $\ell_1$ -norm of vector  $x$ . For random sequences  $a_n$  and  $b_n$ ,  $a_n = O_p(b_n)$  represents that  $a_n$  is stochastically bounded by  $Kb_n$  for a sufficiently large constant  $K$ ;  $a_n = o_p(b_n)$  represents  $a_n/b_n$  converges to 0 with probability tending to 1. Moreover,  $a = O(b)$  means there exists a constant  $K$  such that  $a \leq Kb$ ;  $a = \Omega(b)$  means there exists a sufficiently large constant  $K$  such that  $a \geq Kb$ ;  $a \gg b$  means that there exists a sufficiently  $K$  such that  $a \geq Kb$ . We use  $\nabla f$  ( $\nabla^2 f$ ,  $\nabla^3 f$ ) to represent the first (second, third) derivative of function  $f$  with respect to  $\theta$ . Lastly, constants  $c, C$  may be different from the place to place.

## 1. Proof of Theorem 1

We first define the following additional notations.

- Individualized gradient:  $\nabla f_i(\theta) = -\nabla \log L_i(\theta)$ , full gradient:  $\nabla F_n(\theta) = \frac{1}{n} \sum_i \nabla f_i(\theta)$ . (We may write  $\nabla F_n(\theta) = \nabla F(\theta)$  for simplicity.)
- Individualized stochastic gradient:  $\nabla H_i(\theta, z_i) = -\nabla \log p_\theta(y_i|z_i)$ , batch stochastic gradient  $\nabla H_B(\theta) = \frac{1}{n} \sum_{i \in B} \nabla H_i(\theta, z_i)$ .
- We further write  $\nabla f_i(\theta, \theta') = \mathbb{E}_{z_i \sim p_{\theta'}(z|y_i)} \nabla H_i(\theta, z_i)$  and  $\nabla F_n(\theta, \theta') = \frac{1}{n} \sum_i \nabla f_i(\theta, \theta')$ . Then it is easy to see that  $\nabla f_i(\theta, \theta') = \nabla f_i(\theta)$  and  $\nabla F_n(\theta, \theta') = \nabla F_n(\theta)$ .

**Bound of  $v_t^{s+1}$ :** We first consider to give the upper bound of  $\mathbb{E}\|v_t^{s+1}\|$ . (Here expectation  $\mathbb{E}$  is the conditional expectation which is only taken over all  $i_t^s$ 's and  $z_{i_t^{s+1}}$ 's given other variables. ) For fixed iteration  $s$  and update index  $t$ , we further define  $\zeta_t^{s+1} = H(\theta_t^{s+1}, z_{i_t^{s+1}}) - H(\tilde{\theta}^s, z_{i_t^s})$ . Then, by the definition of  $v_t^{s+1}$ , we have  $v_t^{s+1} = \xi_t^{s+1} + \tilde{\nabla} f^{s+1} = \xi_t^{s+1} + \nabla H_{B^s}(\tilde{\theta}^s)$  according to the definition of our new notation. By taking expectation with respect to  $i_t^{s+1}$  and  $z_{i_t^{s+1}}$ , we have

$$\mathbb{E}_{i_t^{s+1}, z_{i_t^{s+1}}} v_t^{s+1} = \nabla F_n(\theta_t^{s+1}) - \nabla F_n(\tilde{\theta}^s, \theta_t^{s+1}) + \nabla H_{B^s}(\tilde{\theta}^s) := H_t^{s+1}. \quad (8)$$

Thus, we can compute

$$\begin{aligned}
 \mathbb{E}_{i_t^{s+1}, z_{i_t^{s+1}}} [\|v_t^{s+1}\|^2] &= \mathbb{E}_{i_t^{s+1}, z_{i_t^{s+1}}} [\|\zeta_t^{s+1} + \tilde{\nabla} f^{s+1}\|^2] \\
 &= \mathbb{E}_{i_t^{s+1}, z_{i_t^{s+1}}} [\|\zeta_t^{s+1} + \tilde{\nabla} f^{s+1} - H_t^{s+1} + H_t^{s+1}\|^2] \\
 &\leq 2\mathbb{E}_{i_t^{s+1}, z_{i_t^{s+1}}} [\|H_t^{s+1}\|^2] + 2\mathbb{E}_{i_t^{s+1}, z_{i_t^{s+1}}} [\|\zeta_t^{s+1} - \mathbb{E}_{i_t^{s+1}, z_{i_t^{s+1}}} [\zeta_t^{s+1}]\|^2] \\
 &\leq 2\|H_t^{s+1}\|^2 + 2\mathbb{E}_{i_t^{s+1}, z_{i_t^{s+1}}} [\|\zeta_t^{s+1}\|^2] \\
 &\leq 2[\|H_t^{s+1}\|^2] + 2L^2\|\theta_t^{s+1} - \tilde{\theta}^s\|^2 \tag{9}
 \end{aligned}$$

$$\leq 4[\|\nabla F_n(\theta_t^{s+1})\|^2 + \|\eta\|^2] + 2L^2[\|\theta_t^{s+1} - \tilde{\theta}^s\|^2] \tag{10}$$

$$\leq 2C\|\nabla F_n(\theta_t^{s+1})\|^2 + 2L^2\|\theta_t^{s+1} - \tilde{\theta}^s\|^2, \tag{11}$$

by adjusting constant  $C$  and using the fact that  $\mathbb{E}[\|\nabla F(\theta_t^{s+1})\|^2] = \Omega(1/n_1 + (m\gamma)^2)$  before the termination of the algorithm and  $\|\eta\|^2$  is  $O(1/n_1 + (m\gamma)^2)$  (which will be shown in the next paragraph). Here (9) uses the fact that the density function is smooth and hence is  $L$ -lipschitz continuous for some positive  $L$ . Inequality (10) holds due to the fact that  $\|a + b\|^2 \leq \|a\|^2 + \|b\|^2$ , where we write  $\eta = \nabla F_n(\theta_t^{s+1}) - H_t^{s+1}$ . Therefore, we obtain

$$\mathbb{E}[\|v_t^{s+1}\|^2] = 2C\mathbb{E}\|\nabla F_n(\theta_t^{s+1})\|^2 + 2L^2\mathbb{E}\|\theta_t^{s+1} - \tilde{\theta}^s\|^2. \tag{12}$$

**Difference between  $\nabla F_n(\theta_t^{s+1})$  and  $H_t^{s+1}$ :** By straightforward calculation, we can find that

$$\begin{aligned}
 \|\nabla F_n(\theta_t^{s+1}) - H_t^{s+1}\| &= \|\nabla F_n(\tilde{\theta}^s, \theta_t^{s+1}) - \nabla H_{B^s}(\tilde{\theta}^s)\| \\
 &= \|\nabla F_n(\tilde{\theta}^s, \theta_t^{s+1}) - \nabla F_n(\tilde{\theta}^s, \tilde{\theta}^s) + \nabla F_n(\tilde{\theta}^s) - \nabla H_{B^s}(\tilde{\theta}^s)\| \\
 &= \|\nabla F_n(\tilde{\theta}^s, \theta_t^{s+1}) - \nabla F_n(\tilde{\theta}^s, \tilde{\theta}^s)\| + \|\nabla F_n(\tilde{\theta}^s) - \nabla H_{B^s}(\tilde{\theta}^s)\| \\
 &\leq C\|\tilde{\theta}^s - \theta_t^{s+1}\| + \|\nabla F_n(\tilde{\theta}^s) - \nabla H_{B^s}(\tilde{\theta}^s)\|. \tag{13}
 \end{aligned}$$

Note that  $\mathbb{E}\nabla F_n(\tilde{\theta}^s) = \mathbb{E}\nabla H_{B^s}(\tilde{\theta}^s) = \mathbb{E}_y \nabla \log L(\theta)$ . Therefore, by Hoeffding’s concentration inequality, we have that

$$P(\|\nabla F_n(\tilde{\theta}^s) - \mathbb{E}_y \nabla \log L(\theta)\| \geq \frac{C_1}{\sqrt{n}}) \leq \exp\{-2C_1^2/m_1\}$$

and

$$P(\|\nabla H_{B^s}(\tilde{\theta}^s) - \mathbb{E}_y \nabla \log L(\theta)\| \geq \frac{C_2}{\sqrt{n_1}}) \leq \exp\{-2C_2^2/m_2\}$$

where  $m_1$  and  $m_2$  are the upper bounds for  $|\nabla \log L(\theta)|$  and  $|\nabla \log p_\theta(y|z)|$ . Such constants exist by the compactness assumption. Therefore, with high probability, we have that

$$\begin{aligned}
 \|\eta\| = \|\nabla F_n(\theta_t^{s+1}) - H_t^{s+1}\| &\leq C\|\tilde{\theta}^s - \theta_t^{s+1}\| + \frac{C_1}{\sqrt{n}} + \frac{C_2}{\sqrt{n_1}} \\
 &\leq C'(m\gamma + \frac{1}{\sqrt{n_1}}), \tag{14}
 \end{aligned}$$

where the last inequality uses the fact that  $\|\tilde{\theta}^s - \theta_t^{s+1}\|$  is at most of order  $m\gamma$ .

By this, we can further obtain that

$$\begin{aligned}
 \langle \nabla F_n(\theta_t^{s+1}), H_t^{s+1} \rangle &= \langle \nabla F_n(\theta_t^{s+1}), \nabla F_n(\theta_t^{s+1}) \rangle - \langle \nabla F_n(\theta_t^{s+1}), \nabla F_n(\theta_t^{s+1}) - H_t^{s+1} \rangle \\
 &\geq \|\nabla f(\theta_t^{s+1})\|^2 - \|\nabla F_n(\theta_t^{s+1})\| \|\nabla F_n(\theta_t^{s+1}) - H_t^{s+1}\| \\
 &\geq c\|\nabla F_n(\theta_t^{s+1})\|^2 \tag{15}
 \end{aligned}$$

by adjusting constant  $c$  and using the fact that  $\mathbb{E}[\|\nabla F_n(\theta_t^{s+1})\|^2] = \Omega(\|\eta\|)$  before the termination of the algorithm.

**Descent Inequality:** By smoothness of  $F(\theta)$ , we then have

$$\begin{aligned}
 \mathbb{E}[F(\theta_{t+1}^{s+1})] &\leq \mathbb{E}[F(\theta_t^{s+1}) + \langle \nabla F(\theta_t^{s+1}), \theta_{t+1}^{s+1} - \theta_t^{s+1} \rangle + \frac{L}{2} \|\theta_{t+1}^{s+1} - \theta_t^{s+1}\|^2] \\
 &= \mathbb{E}[F(\theta_t^{s+1}) - \gamma \langle \nabla F(\theta_t^{s+1}), v_t^{s+1} \rangle + \frac{L\gamma^2}{2} \|v_t^{s+1}\|^2] \\
 &= \mathbb{E}[F(\theta_t^{s+1}) - \gamma \langle \nabla F(\theta_t^{s+1}), H_t^{s+1} \rangle + \frac{L\gamma^2}{2} \|v_t^{s+1}\|^2],
 \end{aligned} \tag{16}$$

for some constant  $L$ .

Consider the following Lyapunov function (Reddi et al., 2016)

$$R_t^{s+1} := \mathbb{E}[F(\theta_t^{s+1}) + c_t \|\theta_t^{s+1} - \tilde{\theta}^s\|^2],$$

where  $c_t$  is defined recursively in (19). We can compute that

$$\begin{aligned}
 &\mathbb{E}[\|\theta_{t+1}^{s+1} - \tilde{\theta}^s\|^2] \\
 &= \mathbb{E}[\|\theta_{t+1}^{s+1} - \theta_t^{s+1}\|^2 + \|\theta_t^{s+1} - \tilde{\theta}^s\|^2 + 2\langle \theta_{t+1}^{s+1} - \theta_t^{s+1}, \theta_t^{s+1} - \tilde{\theta}^s \rangle] \\
 &= \mathbb{E}[\gamma^2 \|v_t^{s+1}\|^2 + \|\theta_t^{s+1} - \tilde{\theta}^s\|^2] + 2\gamma \mathbb{E}[\langle H_t^{s+1}, \theta_t^{s+1} - \tilde{\theta}^s \rangle] \\
 &\leq \mathbb{E}[\gamma^2 \|v_t^{s+1}\|^2 + \|\theta_t^{s+1} - \tilde{\theta}^s\|^2] + 2\gamma \mathbb{E}[\frac{1}{2\beta_t} \|H_t^{s+1}\|^2 + \frac{\beta_t}{2} \|\theta_t^{s+1} - \tilde{\theta}^s\|^2] \\
 &\leq \mathbb{E}[\gamma^2 \|v_t^{s+1}\|^2 + \|\theta_t^{s+1} - \tilde{\theta}^s\|^2] + 2\gamma \mathbb{E}[\frac{c_2}{2\beta_t} \|\nabla f(\theta_t^{s+1})\|^2 + \frac{\beta_t}{2} \|\theta_t^{s+1} - \tilde{\theta}^s\|^2],
 \end{aligned} \tag{17}$$

where  $\beta_t$  will be determined later. Combining (16) and (17), we then have

$$\begin{aligned}
 R_{t+1}^{s+1} &= \mathbb{E}[F(\theta_{t+1}^{s+1}) + c_{t+1} \|\theta_{t+1}^{s+1} - \tilde{\theta}^s\|^2] \\
 &\leq \mathbb{E}[F(\theta_t^{s+1}) - \gamma \langle \nabla F(\theta_t^{s+1}), H_t^{s+1} \rangle + \frac{L\gamma^2}{2} \|v_t^{s+1}\|^2] \\
 &\quad + c_{t+1} (\mathbb{E}[\gamma^2 \|v_t^{s+1}\|^2 + \|\theta_t^{s+1} - \tilde{\theta}^s\|^2] + 2\gamma \mathbb{E}[\frac{1}{2\beta_t} \|H_t^{s+1}\|^2 + \frac{\beta_t}{2} \|\theta_t^{s+1} - \tilde{\theta}^s\|^2]) \\
 &= \mathbb{E}[F(\theta_t^{s+1}) - (c\gamma - c_2 \frac{c_{t+1}\gamma}{\beta_t}) \|\nabla F(\theta_t^{s+1})\|^2] \\
 &\quad + (\frac{L\gamma^2}{2} + c_{t+1}\gamma^2) \mathbb{E}[\|v_t^{s+1}\|^2] + (c_{t+1} + c_{t+1}\gamma\beta_t) \mathbb{E}[\|\theta_t^{s+1} - \tilde{\theta}^s\|^2].
 \end{aligned} \tag{18}$$

Together with the bound on  $\mathbb{E}\|v_t^{s+1}\|^2$ , we then have

$$\begin{aligned}
 R_{t+1}^{s+1} &\leq \mathbb{E}[F(\theta_t^{s+1})] \\
 &\quad - (c\gamma - \frac{c_2 c_{t+1}\gamma}{\beta_t} - C\gamma^2 L - 2Cc_{t+1}\gamma^2) \mathbb{E}[\|\nabla F(\theta_t^{s+1})\|^2] \\
 &\quad + (c_{t+1}(1 + \gamma\beta_t + 2\gamma^2 L^2) + \gamma^2 L^3) \mathbb{E}[\|\theta_t^{s+1} - \tilde{\theta}^s\|^2] \\
 &= R_t^{s+1} - (c\gamma - \frac{c_2 c_{t+1}\gamma}{\beta_t} - C\gamma^2 L - 2Cc_{t+1}\gamma^2) \mathbb{E}[\|\nabla F(\theta_t^{s+1})\|^2],
 \end{aligned}$$

where we define the recursive relationship between  $c_t$ 's, i.e.,

$$c_t = c_{t+1}(1 + \gamma\beta_t + 2\gamma^2 L^2) + \gamma^2 L^3. \tag{19}$$

For notational simplicity, we define

$$\Gamma_t = c\gamma - \frac{c_2 c_{t+1}\gamma}{\beta_t} - C\gamma^2 L - 2Cc_{t+1}\gamma^2$$

and  $\gamma_{min} = \min_t \Gamma_t$ . We add up (19) over  $t$  from 0 to  $t - 1$  and get

$$\gamma_{min} \sum_{t=0}^{m-1} \mathbb{E}[\|\nabla F(\theta_t^{s+1})\|^2] \leq R_0^{s+1} - R_m^{s+1}.$$

Note that  $c_m = 0$ , then  $R_m^{s+1} = \mathbb{E}[F(\theta_m^{s+1})] = \mathbb{E}[F(\tilde{\theta}^{s+1})]$  and that  $R_0^{s+1} = \mathbb{E}[F(\theta_0^{s+1})] = \mathbb{E}[F(\tilde{\theta}^s)]$ . Therefore, we have

$$\frac{1}{T} \sum_{s=0}^{S-1} \sum_{t=0}^{m-1} \mathbb{E}[\|\nabla F(\theta_t^{s+1})\|^2] \leq (F(\theta^0) - F(\tilde{\theta})) / (T\gamma_{min}). \quad (20)$$

Recall that  $T_{min}(\epsilon)$  is  $\arg \min_t \min_s \{\mathbb{E}\|\nabla F(\theta_t^s)\|^2 \leq \epsilon\}$ . Then (20) gives us that  $T_{min}(\epsilon) \leq \frac{F(\theta^0) - F(\tilde{\theta})}{m\gamma_{min}\epsilon}$  with high probability. This completes the proof of Theorem 1.

**Choice of  $n_1, m$  and  $\gamma$ :** We take  $\beta_t$  as the constant  $\beta$  (i.e., free of  $t$  and  $s$ ) and let  $r = 2\gamma^2 L^2 + \gamma\beta$ ,  $\gamma = \frac{1}{Ln^\alpha}$ ,  $m = n^{\alpha_1}$ ,  $n_1 = n^{2(\alpha - \alpha_1)}$ ,  $\beta = Ln^{-\alpha/2}$ . Then  $r$  is bounded by  $\gamma\beta + L^2\gamma^2 = O(\gamma\beta)$ . We can compute  $c_0$  which is bounded by

$$\begin{aligned} c_0 &= L^3 \gamma^2 \frac{(1+r)^m - 1}{r} \\ &\leq L^3 \gamma^2 \frac{(1+\gamma\beta)^m - 1}{\gamma\beta} \\ &= Ln^{-\alpha/2} ((1+\gamma\beta)^m - 1) \\ &\leq \mu Ln^{-\alpha/2}, \end{aligned} \quad (21)$$

where  $\mu = O(\gamma\beta m)$  which goes to 0 as  $n \rightarrow \infty$ . By the definition of  $\gamma_{min}$ , we can compute

$$\begin{aligned} \gamma_{min} &= \min_t \left\{ c\gamma - \frac{c_2 c_{t+1} \gamma}{\beta_t} - C\gamma^2 L - 2C c_{t+1} \gamma^2 \right\} \\ &\geq c\gamma - \frac{c_0 \gamma}{\beta} - \gamma^2 L - 2c_0 \gamma^2 \\ &\geq \frac{c'}{Ln^\alpha} \end{aligned} \quad (22)$$

holds for some constant  $c'$ . Here the last inequality holds since that  $c_0/\beta$  is upper bounded by some constant times  $(1+\gamma\beta)^m - 1$  which is  $o(1)$ ,  $\gamma^2 L \ll \gamma$  and  $\gamma^2 \ll \gamma$ .

Therefore, it gives  $T(\epsilon) \leq C \frac{n^\alpha (F(\theta^0) - F(\tilde{\theta}))}{m\epsilon}$ . This concludes the proof of Theorem 1. Taking  $n_1 = n^{\alpha_1}$ , then the computational complexity will be  $(n_1 + m) \frac{n^\alpha}{m}$ , which is  $n^\alpha$  if  $\alpha_1 \geq 2\alpha/3$  and  $n^{2(\alpha - \alpha_1)} n^\alpha / n^{\alpha_1} = n^{3\alpha - 3\alpha_1}$  if  $\alpha_1 < 2\alpha/3$ . Thus the total computational complexity is simplified as  $C \frac{n^\alpha (F(\theta^0) - F(\tilde{\theta}))}{\epsilon}$  by taking  $m = n^{2\alpha/3}$  and  $n_1 = n^{2\alpha/3}$ . This gives Corollary 1.

## 2. Proof of Theorem 2

By Corollary 1, we know that  $\|\nabla F(\hat{\theta})\|^2 = O_p(n^{-2\alpha/3})$ . By Taylor expansion, we have that

$$\nabla F(\hat{\theta}) = \nabla F(\bar{\theta}) + \nabla^2 F(\check{\theta})(\hat{\theta} - \bar{\theta}) = \nabla^2 F(\check{\theta})(\hat{\theta} - \bar{\theta}), \quad (23)$$

where  $\bar{\theta}$  is  $\arg \min_{\theta} F(\theta)$  (also known as the maximal likelihood estimator) and  $\check{\theta}$  is a point between  $\hat{\theta}$  and  $\bar{\theta}$ . Since both  $\hat{\theta}$  and  $\bar{\theta}$  are consistent estimator for  $\theta^*$ , thus  $\nabla^2 F(\check{\theta}) = I(\theta^*) + o_p(1)$  where  $I(\theta^*)$  is the information matrix. Thus,  $\|\hat{\theta} - \bar{\theta}\|^2 = O_p(n^{-2\alpha/3})$  as well.

Expand  $\nabla F(\theta)$  at  $\hat{\theta}$ , we have

$$0 = \nabla F(\bar{\theta}) = \nabla F(\hat{\theta}) + \nabla^2 F(\hat{\theta})(\bar{\theta} - \hat{\theta}) + \frac{1}{2} \nabla^3 F(\xi)(\bar{\theta} - \hat{\theta})^2. \quad (24)$$

Since we have already know that  $|\nabla H(\hat{\theta}) - \nabla f(\hat{\theta})| = O_p(\frac{1}{\sqrt{n}})$  and  $|\nabla^2 H(\hat{\theta}) - \nabla^2 f(\hat{\theta})| = O_p(\frac{1}{\sqrt{n}})$ . Plugging the formula of  $\theta^{r_1}$  into (24), we get

$$\begin{aligned} 0 &= O_p(\frac{1}{\sqrt{n}}) + \nabla H(\hat{\theta}) + \nabla^2 F(\hat{\theta})(\bar{\theta} - \hat{\theta}) + \frac{1}{2} \nabla^3 F(\xi)(\bar{\theta} - \hat{\theta})^2 \\ &= O_p(\frac{1}{\sqrt{n}}) + \nabla^2 H(\hat{\theta})(\bar{\theta} - \theta^{r_1}) + \nabla^2 f(\hat{\theta})(\bar{\theta} - \hat{\theta}) + \frac{1}{2} \nabla^3 f(\xi)(\bar{\theta} - \hat{\theta})^2 \\ &= O_p(\frac{1}{\sqrt{n}}) + \nabla^2 H(\hat{\theta})(\bar{\theta} - \theta^{r_1}) + \frac{1}{2} \nabla^3 f(\xi)(\bar{\theta} - \hat{\theta})^2 \end{aligned} \quad (25)$$

Then we arrive at

$$\|\bar{\theta} - \theta^{r_1}\| = (\sigma_{\min}(\nabla^2 H(\hat{\theta})))^{-1} (O_p(\frac{1}{\sqrt{n}}) + \frac{1}{2} |\nabla^3 f(\xi)| \|\bar{\theta} - \hat{\theta}\|^2).$$

We know that the algorithm returns  $\hat{\theta}$  satisfy that  $\|\hat{\theta} - \theta^*\| = O_p(\frac{1}{n^{1/3\alpha}})$ . Therefore, we arrive at

$$\|\bar{\theta} - \theta^{r_1}\| = O_p(\frac{1}{\sqrt{n}} + n^{-2\alpha/3}).$$

Thus, when  $3/4 < \alpha < 1$ , we get  $\|\bar{\theta} - \theta^{r_1}\| = O_p(\frac{1}{\sqrt{n}})$ . It is known that MLE is root  $n$ -consistent. Thus we finally get

$$\|\theta^{r_1} - \theta^*\| = O_p(\frac{1}{\sqrt{n}}).$$

By two-step refinement, we recall the formula

$$\theta^{r_2} = \theta^{r_1} - \frac{\nabla H(\theta^{r_1})}{\nabla^2 H(\theta^{r_1})}. \quad (26)$$

Next we can show the normality of  $\theta^{r_2}$ . By Taylor expansion, we know

$$\nabla H(\theta^{r_1}) = \nabla H(\theta^*) + (\theta^{r_1} - \theta^*) \nabla H^2(\theta^*) + \frac{1}{2} (\theta^{r_1} - \theta^*) \nabla^3 H(\xi), \quad (27)$$

where  $\xi$  lies between  $\theta^*$  and  $\theta^{r_1}$ . Put (26) into the above equation, we can get

$$\begin{aligned} \sqrt{n}(\theta^{r_2} - \theta^*) &= \frac{(1/\sqrt{n})\nabla H(\theta^*)}{-(1/n)\nabla^2 H(\theta^{r_1})} + \sqrt{n}(\theta^{r_1} - \theta^*) \\ &\quad \cdot \left[ 1 - \frac{\nabla^2 H(\theta^*)}{\nabla^2 H(\theta^{r_1})} - \frac{1}{2} (\theta^{r_1} - \theta^*) \frac{\nabla^3 H(\xi)}{\nabla^2 H(\theta^{r_1})} \right] \end{aligned} \quad (28)$$

after simplification. Then, we can see that the first term of (28) converges to  $N(0, I^{-1}(\theta^*)V(\theta^*)I^{-1}(\theta^*))$ . The second term of (28) is  $o_p(1)$  since that  $\sqrt{n}(\theta^{r_1} - \theta^*)$  is  $O_p(1)$ ,  $1 - \frac{\nabla^2 H(\theta^*)}{\nabla^2 H(\theta^{r_1})} = o_p(1)$  and  $(\theta^{r_1} - \theta^*) \frac{\nabla^3 H(\xi)}{\nabla^2 H(\theta^{r_1})}$  is  $o_p(1)$ . Lastly, by Slutsky Theorem, we get

$$\sqrt{n}(\theta^{r_2} - \theta^*) \rightarrow N(0, I^{-1}(\theta^*)V(\theta^*)I^{-1}(\theta^*)).$$

### 3. Proof of Theorem 3

We require the following lemmas for convergence analysis under non-smooth setting.

**Lemma 1** *Let  $R$  be a closed convex function and  $x, y \in \text{dom}(R)$ . Then it holds*

$$\|\text{prox}_R(x) - \text{prox}_R(y)\| \leq \|x - y\|.$$

**Lemma 2** *Let  $P(\theta) = F(\theta) + R(\theta)$ , where  $\nabla F(\theta)$  is  $L$ -Lipschitz continuous, and  $F(\theta)$  and  $R(\theta)$  are strongly convex with parameter  $\mu_F$  and  $\mu_R$ . For any  $\theta$  in domain and vector  $v$ , define*

$$\theta^+ = \text{prox}_{\gamma R}(\theta - \gamma v), \quad g = \frac{1}{\gamma}(\theta - \theta^+), \quad \Delta = v - \nabla F(\theta),$$

then it holds that

$$P(y) \geq P(\theta^+) + g^T(y - \theta) + \frac{\eta}{2}\|g\|^2 + \frac{\mu_F}{2}\|y - \theta\|^2 + \frac{\mu_R}{2}\|y - \theta^+\|^2 + \Delta^T(\theta^+ - y) \quad (29)$$

for any  $y$  in the domain and  $0 < \gamma < 1/L$ .

The proofs of above Lemmas are omitted here. Their proofs can be found in [Rockafellar \(1970\)](#); [Xiao and Zhang \(2014\)](#).

**Proof of Main Results** Using the update rule, we know

$$\begin{aligned} \|\theta_{t+1}^{s+1} - \theta_*\|^2 &= \|\theta_t^{s+1} - \gamma g_t^{s+1} - \theta_*\|^2 \\ &= \|\theta_t^{s+1} - \theta_*\|^2 - 2\gamma(g_t^{s+1})^T(\theta_t - \theta_*) + \gamma^2\|g_t^{s+1}\|^2. \end{aligned} \quad (30)$$

By applying Lemma 2 with  $\theta = \theta_t^{s+1}$ ,  $v = v_t^{s+1}$ ,  $\theta^+ = \theta_{t+1}^{s+1}$ ,  $g = g_t^{s+1}$  and  $y = \theta_*$ , we get

$$-(g_t^{s+1})^T(\theta_t^{s+1} - \theta_*) + \frac{\gamma}{2}\|g_t^{s+1}\|^2 \leq P(\theta_*) - P(\theta_{t+1}^{s+1}) - \frac{\mu_F}{2}\|\theta_t^{s+1} - \theta_*\|^2 - \frac{\mu_R}{2}\|\theta_{t+1}^{s+1} - \theta_*^{s+1}\|^2 - \Delta_t^T(\theta_{t+1}^{s+1} - \theta_*),$$

where  $\Delta_t^{s+1} = v_t^{s+1} - \nabla F(\theta_t^{s+1})$ . Therefore,

$$\begin{aligned} \|\theta_{t+1}^{s+1} - \theta_*^{s+1}\|^2 &\leq \|\theta_t^{s+1} - \theta_*^{s+1}\|^2 - \gamma\mu_F\|\theta_t^{s+1} - \theta_*\|^2 - \gamma\mu_R\|\theta_{t+1}^{s+1} - \theta_*\|^2 \\ &\quad - 2\gamma(P(\theta_{t+1}^{s+1}) - P(\theta_*)) - 2\gamma\Delta_t^T(\theta_{t+1}^{s+1} - \theta_*) \\ &\leq \|\theta_t^{s+1} - \theta_*\|^2 - 2\gamma(P(\theta_{t+1}^{s+1}) - P(\theta_*)) - 2\gamma\Delta_t^T(\theta_{t+1}^{s+1} - \theta_*). \end{aligned} \quad (31)$$

We next bound the quantity  $-2\gamma(\Delta_t^{s+1})^T(\theta_{t+1}^{s+1} - \theta_*)$ . We define the full proximal gradient update as

$$\bar{\theta}_{t+1}^{s+1} = \text{prox}_{\gamma R}(\theta_t^{s+1} - \gamma\nabla F(\theta_t^{s+1})),$$

though it is not used in algorithm. Then,

$$\begin{aligned} -2\gamma(\Delta_t^{s+1})^T(\theta_{t+1}^{s+1} - \theta_*) &= -2\gamma(\Delta_t^{s+1})^T(\theta_{t+1}^{s+1} - \bar{\theta}_{t+1}^{s+1}) - 2\gamma(\Delta_t^{s+1})^T(\bar{\theta}_{t+1}^{s+1} - \theta_*^{s+1}) \\ &\leq 2\gamma\|\Delta_t^{s+1}\|\|\theta_{t+1}^{s+1} - \bar{\theta}_{t+1}^{s+1}\| - 2\gamma(\Delta_t^{s+1})^T(\bar{\theta}_{t+1}^{s+1} - \theta_*) \\ &\leq 2\gamma\|\Delta_t^{s+1}\|\|(\theta_t^{s+1} - \gamma v_t^{s+1}) - (\theta_t^{s+1} - \gamma\nabla F(\theta_t^{s+1}))\| \\ &\quad - 2\gamma(\Delta_t^{s+1})^T(\bar{\theta}_{t+1}^{s+1} - \theta_*) \\ &= 2\gamma^2\|\Delta_t^{s+1}\|^2 - 2\gamma(\Delta_t^{s+1})^T(\bar{\theta}_{t+1}^{s+1} - \theta_*), \end{aligned} \quad (32)$$

Thus (31) becomes

$$\|\theta_{t+1}^{s+1} - \theta_*\|^2 \leq \|\theta_t^{s+1} - \theta_*\|^2 - 2\gamma(P(\theta_{t+1}^{s+1}) - P(\theta_*)) + 2\gamma^2\|\Delta_t^{s+1}\|^2 - 2\gamma(\Delta_t^{s+1})^T(\bar{\theta}_{t+1}^{s+1} - \theta_*).$$

We take expectation on both sides with respect to  $i_t^{s+1}$  and  $z_{i_t^{s+1}}$  to get

$$\mathbb{E}\|\theta_{t+1}^{s+1} - \theta_*\|^2 \leq \|\theta_t^{s+1} - \theta_*\|^2 - 2\gamma\mathbb{E}(P(\theta_{t+1}^{s+1}) - P(\theta_*)) + \gamma\eta,$$

where we use the boundness of  $\mathbb{E}\|\Delta_t^{s+1}\|$  and  $\|\theta_{t+1}^{s+1} - \theta_*\| \leq \eta$ . Before the termination of Algorithm 1, we know that  $E(P(\theta_{t+1}^{s+1}) - P(\theta_*)) = \Omega(\eta)$ . Therefore, we have

$$\mathbb{E}\|\theta_{t+1}^{s+1} - \theta_*\|^2 \leq \|\theta_t^{s+1} - \theta_*\|^2 - 2c\gamma\mathbb{E}(P(\theta_{t+1}^{s+1}) - P(\theta_*)). \quad (33)$$

By summing the above inequality over all  $s$  and  $t$ , then we get

$$2cmT\epsilon \leq \sum_{s=1}^T \sum_{t=1}^m 2c\gamma\mathbb{E}(P(\theta_{t+1}^{s+1}) - P(\theta_*)) \leq \|\theta^0 - \theta_*\|^2. \quad (34)$$

We get  $T(\epsilon) \leq \frac{\|\theta^0 - \theta_*\|^2}{2cm\epsilon}$ . This concludes the proof of Theorem 2.

Then the total computational complexity is

$$O\left(\frac{\|\theta_0 - \theta_*\|^2}{m\gamma\epsilon} \max\{m, n_1\}\right)$$

for any  $\epsilon = \Omega(\frac{1}{\sqrt{n_1}} + m\gamma)$ . When  $m = n^{\alpha_1}$ ,  $n_1 = m^{2(\alpha - \alpha_1)}$  and  $\gamma = n^{-\alpha}$  with  $\alpha_1 = 2/3\alpha$ , the computational complexity is  $O(n^\alpha \|\theta_0 - \theta_*\|^2 / \epsilon)$ .

#### 4. Proof of Theorem 4

Let  $S_1^*$  be the set of indices corresponding to position of  $\theta^*$  where true value is non-zero and  $S_0^*$  be the set of indices corresponding to position of  $\theta^*$  where true value is zero. For notational simplicity, we define  $\theta_{(1)} = \theta[S_1^*]$  and  $\theta_{(0)} = \theta[S_0^*]$ . Next, we show that the solution  $\hat{\theta}$  with  $\hat{\theta}[S_0^*] = 0$  satisfies Karush-Kuhn-Tucker (KKT) condition. We then can write

$$\nabla F(\theta) = \begin{pmatrix} \nabla_1 F(\theta) \\ \nabla_0 F(\theta) \end{pmatrix},$$

and write

$$\nabla^2 F(\theta) = \begin{pmatrix} \nabla_{11}^2 F(\theta) & \nabla_{10}^2 F(\theta) \\ \nabla_{01}^2 F(\theta) & \nabla_{00}^2 F(\theta) \end{pmatrix},$$

where  $\nabla_1 F(\theta)$  is the subvector of gradient corresponding to  $\theta_{(1)}$  and  $\nabla_{11}^2 F(\theta)$  is the block of Hessian matrix corresponding to  $\theta_{(1)}$ . Rest quantities are defined in the same fashion.

We then recall the irrepresentable condition.

- Assume there exists a positive constant  $\eta$  such that

$$|\nabla_{01} F(\theta^*) \nabla_{11}^2 F(\theta^*)^{-1} \text{sign}(\theta_{(1)}^*)| \leq 1 - \eta. \quad (35)$$

Here the “ $\leq$ ” means that the inequality holds element-wisely.

We expand  $\nabla F(\hat{\theta})$  at  $\theta^*$  by Taylor expansion. Then we get

$$\nabla F(\hat{\theta}) = \nabla F(\theta^*) + \nabla^2 F(\theta^*)(\hat{\theta} - \theta^*) + O((\hat{\theta} - \theta^*)^2). \quad (36)$$

For subvector  $\hat{\theta}_{(1)}$  and  $\theta_{(1)}^*$ , we can get the similar equation, that is,

$$\nabla_1 F(\hat{\theta}) = \nabla_1 F(\theta^*) + \nabla_{11}^2 F(\theta^*)(\hat{\theta}_{(1)} - \theta_{(1)}^*) + O((\hat{\theta}_{(1)} - \theta_{(1)}^*)^2). \quad (37)$$

This implies

$$\hat{\theta}_{(1)} - \theta_{(1)}^* = -(\nabla_{11}^2 F(\theta^*))^{-1} (\nabla_1 F(\hat{\theta})) + O_p\left(\frac{1}{\sqrt{n}}\right) \quad (38)$$

For those positions in  $S_0^*$ , we can compute

$$\begin{aligned}\nabla_0 F(\hat{\theta}) &= -\nabla_{01} F(\theta^*) (\nabla_{11}^2 F(\theta^*))^{-1} (\nabla_1 F(\hat{\theta}) + O_p(\frac{1}{\sqrt{n}})) + O((\hat{\theta} - \theta^*)^2) \\ &= -\nabla_{01} F(\theta^*) (\nabla_{11}^2 F(\theta^*))^{-1} \nabla_1 F(\hat{\theta}) + O_p(\frac{1}{\sqrt{n}}) + O_p(n^{-\alpha/3})\end{aligned}\quad (39)$$

Note that  $\nabla_1 F(\hat{\theta}) = \tau \text{sign}(\theta_{(1)}^*) + O_p(n^{-\alpha/6})$ , we have

$$|\nabla_0 F(\hat{\theta})| \leq \xi_c (\tau(1 - \eta) + O_p(n^{-\alpha/6})) + O_p(\frac{1}{\sqrt{n}}) + O_p(n^{-\alpha/3}) < \tau \quad (40)$$

when  $\tau \geq n^{-\alpha/6}$ . Thus, we know that  $\hat{\theta}_{(0)} = \mathbf{0}$ . This completes the proof.

## 5. Proof of Results in Network Case

Let  $d_i$  be the number of nodes that the  $i$ -th node connects to and  $A$  be the edge list. Let  $|A|$  be the cardinality of  $A$  and we know  $2|A| = \sum d_i$ . The objective function is

$$L(\theta) = \sum_{\mathbf{z}} p(\mathbf{z}) \prod_{(i,j) \in A} f(\theta | z_i, z_j). \quad (41)$$

Thus

$$\begin{aligned}\nabla \log L(\theta) &= \nabla \log \left\{ \sum_{\mathbf{z}} p(\mathbf{z}) \prod_{(i,j) \in A} f_{\theta}(y_{ij} | z_i, z_j) \right\} \\ &= \sum_{\mathbf{z}} \left\{ \nabla \log \left( p(\mathbf{z}) \prod_{(i,j) \in A} f_{\theta}(y_{ij} | z_i, z_j) \right) \right\} p(\mathbf{z} | \theta) \\ &= \sum_{\mathbf{z}} \left\{ \nabla \log \prod_{(i,j) \in A} f_{\theta}(y_{ij} | z_i, z_j) \right\} p(\mathbf{z} | \theta)\end{aligned}\quad (42)$$

$$= \sum_{\mathbf{z}} \left\{ \sum_{(i,j) \in A} \nabla \log f_{\theta}(y_{ij} | z_i, z_j) \right\} p(\mathbf{z} | \theta) \quad (43)$$

$$= \mathbb{E}_{\mathbf{z}} \left\{ \sum_{(i,j) \in A} \nabla \log f_{\theta}(y_{ij} | z_i, z_j) \right\}. \quad (44)$$

Next we show the local convergence property of Algorithm 2 under the latent network setting. For any  $\theta \in B(\theta^*, \delta)$  with some small radius  $\delta$ , we can show that  $p(\mathbf{z} | \theta) \rightarrow \mathbf{1}_{\mathbf{z}=\mathbf{z}^*}$  (i.e., a probability mass function which puts total point probability on true latent memberships). More specifically, according to Lemma 3, it gives  $d_{TV}(p(\mathbf{z} | \theta), \mathbf{1}_{\mathbf{z}=\mathbf{z}^*}) \leq \exp\{-cd_{min}\}$  for some positive constant  $c$  and  $d_{min}$  is the minimum of  $d_i$ 's.

We first prove several useful lemmas.

**Lemma 3** For any  $\theta \in B(\theta^*, \delta)$ , there exists a constant  $c$  such that

$$\|p(\mathbf{z} | \theta) - \mathbf{1}_{\mathbf{z}=\mathbf{z}^*}\|_{TV} \leq \exp\{-cd_{min}\}. \quad (45)$$

**Proof of Lemma 3** To prove (3), it is equivalent to prove

$$\sum_{\mathbf{z} \neq \mathbf{z}^*} p_{\theta}(\mathbf{z}) = p_{\theta}(\mathbf{z}^*) \cdot \exp\{-cd_{min}\}, \quad (46)$$

where  $p_{\theta}(\mathbf{z}) = p_{\theta}(\mathbf{z}, \mathbf{y})$  is the complete likelihood function. We omit script  $\mathbf{y}$  for notational simplicity.

The main step of the proof is to show that

$$\log p_{\theta}(\mathbf{z}) \leq \log p_{\theta}(\mathbf{z}^*) - cd_{min} \|\mathbf{z} - \mathbf{z}^*\|_0 \quad (47)$$

holds for all  $\mathbf{z} \neq \mathbf{z}^*$  with high probability. According to concentration lemma 5, we have

$$\begin{aligned} & P(|\log p_\theta(\mathbf{z}) - \log p_\theta(\mathbf{z}^*) - \mathbb{E}[\log p_\theta(\mathbf{z}) - \log p_\theta(\mathbf{z}^*)]| \geq |\mathbf{z} - \mathbf{z}^*|_0 d_{\min} x) \\ & \leq \exp\{-|\mathbf{z} - \mathbf{z}^*|_0 d_{\min} x^2\} \end{aligned} \quad (48)$$

by taking  $g_\theta(z) = \log p_\theta(\mathbf{z}) - \log p_\theta(\mathbf{z}^*)$ . By model identifiability, we know that there exists constant  $c_0$  such that

$$\mathbb{E}[\log p_\theta(\mathbf{z})] - \mathbb{E}[\log p_\theta(\mathbf{z}^*)] \leq c_0 |\mathbf{z} - \mathbf{z}^*|_0 d_{\min}. \quad (49)$$

By taking  $x = c_0/2$  in (48), we have

$$\log p_\theta(\mathbf{z}) \leq \log p_\theta(\mathbf{z}^*) - \frac{c_0}{2} d_{\min} |\mathbf{z} - \mathbf{z}^*|_0 \quad (50)$$

with probability at least  $1 - \exp\{-|\mathbf{z} - \mathbf{z}^*|_0 d_{\min} c_0^2/4\}$ . Therefore, we have

$$\begin{aligned} & P(\log p_\theta(\mathbf{z}) \leq \log p_\theta(\mathbf{z}^*) - \frac{c_0}{2} d_{\min} |\mathbf{z} - \mathbf{z}^*|_0, \text{ for any } \mathbf{z}) \\ & \geq 1 - \sum_{\mathbf{z}} \exp\{-|\mathbf{z} - \mathbf{z}^*|_0 d_{\min} c_0^2/4\} \\ & = 1 - \sum_{d=1}^n \sum_{\mathbf{z}: |\mathbf{z} - \mathbf{z}^*|_0 = d} \exp\{-|\mathbf{z} - \mathbf{z}^*|_0 d_{\min} c_0^2/4\} \\ & = 1 - \sum_{d=1}^n \frac{n!}{(n-d)!(d)!} \exp\{-d d_{\min} c_0^2/4\} \\ & \geq 1 - \sum_{d=1}^n n^d \exp\{-d d_{\min} c_0^2/4\} \end{aligned} \quad (51)$$

$$\begin{aligned} & \geq 1 - (1 - \exp\{-d_{\min} c_0^2/4 + \log n\})^{-1} \exp\{-d_{\min} c_0^2/4 + \log n\} \\ & \geq 1 - \exp\{-c' d_{\min}\} \end{aligned} \quad (52)$$

by adjusting the constant  $c'$  and the fact that  $d_{\min} \gg \log n$ . This establishes (46) and the lemma follows as well.

**Lemma 4** For any  $\theta \in B(\theta^*, \delta)$ , there exist constants  $c', c''$  such that

$$\|\nabla L(\theta) - \nabla L(\theta|\mathbf{z}^*)\| \leq \exp\{-c' d_{\min}\}. \quad (53)$$

and

$$\|\nabla L_i(\theta) - \nabla L_i(\theta|\mathbf{z}^*)\| \leq \exp\{-c' d_{\min}\} \quad (54)$$

hold with probability at least  $1 - \exp\{-c'' d_{\min}\}$ .

The proof of Lemma 4 is similar to that of Lemma 3. Hence, we omit here.

**Lemma 5** Suppose  $g_\theta(z)$  is any function of form  $\sum_{i \in A_s} \sum_{j \in A_i} \log f_\theta(y_{ij}|z_i, z_j)$ , where  $A_s$  is arbitrary subset of  $\{1, \dots, n\}$ . Then it holds that

$$P(|g_\theta(z) - \mathbb{E}g_\theta(z)| \geq |\bar{A}_s| x) \leq \exp\{-C|A_s|d_{\min}x^2\}, \quad (55)$$

for some constant  $C$ . Here  $\bar{A}_s := \{(i, j) : i \in A_s, j \in A_i\}$ .

**Proof of Lemma 5** By boundness assumption, we know there exist constant  $M$  such that  $|\log f_\theta(y_{ij}|z_i, z_j) - \mathbb{E} \log f_\theta(y_{ij}|z_i, z_j)| \leq M$ . Then, by Hoeffding's inequality, we have

$$\begin{aligned} P(|g_\theta(z) - \mathbb{E}g_\theta(z)| \geq |\bar{A}_s| x) & \leq \exp\left\{-2 \frac{|\bar{A}_s|^2 x^2}{|\bar{A}_s| M^2}\right\}, \\ & \leq \exp\left\{-2 \frac{|\bar{A}_s| x^2}{M^2}\right\} \\ & \leq \exp\{-C|A_s|d_{\min}x^2\} \end{aligned} \quad (56)$$

by adjusting the constant  $C$ . This concludes the lemma.

We define the following quantities,

$$\nabla H(\theta, \mathbf{z}) := \frac{1}{|A|} \sum_{(i,j) \in A} \nabla \log f_{\theta}(y_{ij}|z_i, z_j),$$

$$\nabla H_i(\theta, \mathbf{z}) := \frac{1}{d_i} \sum_{j:(i,j) \in A} \nabla \log f_{\theta}(y_{ij}|z_i, z_j),$$

and

$$\nabla H_B(\theta, \mathbf{z}) := \frac{1}{\sum_{i \in B} d_i} \sum_{(i,j) \in A, i \in B} \nabla \log f_{\theta}(y_{ij}|z_i, z_j).$$

We also define

$$\nabla H(\theta) := \frac{1}{|A|} \sum_{(i,j) \in A} \nabla \log f_{\theta}(y_{ij}|z_i^*, z_j^*),$$

$$\nabla H_i(\theta) := \frac{1}{d_i} \sum_{j:(i,j) \in A} \nabla \log f_{\theta}(y_{ij}|z_i^*, z_j^*),$$

and

$$\nabla H_B(\theta) := \frac{1}{\sum_{i \in B} d_i} \sum_{(i,j) \in A, i \in B} \nabla \log f_{\theta}(y_{ij}|z_i^*, z_j^*).$$

Therefore, we can compute

$$\begin{aligned} \mathbb{E}_{z_i^{s+1}, z_{i_t}^{s+1}} v_t^{s+1} &= \frac{1}{2|A|} \sum_{i=1}^n \mathbb{E}_{z_i \sim p_{\theta_t^{s+1}}(z|\mathbf{y})} \nabla H_i(\theta_t^{s+1}, \mathbf{z}_t^{s+1}) \\ &\quad - \frac{1}{2|A|} \sum_{i=1}^n \mathbb{E}_{z_i \sim p_{\theta_t^s}(z|\mathbf{y})} \nabla H_i(\tilde{\theta}^s, \mathbf{z}_t^{s+1}) + \nabla H_B(\tilde{\theta}^s, \mathbf{z}^s) \\ &= \nabla H(\theta_t^{s+1}) - \nabla H(\tilde{\theta}^s) + \nabla H_B(\tilde{\theta}^s) + O(\exp\{-c' d_{\min}\}), \\ &:= H_t^{s+1} \end{aligned} \tag{57}$$

according to Lemma 3. We next consider to compute the upper bound of  $\mathbb{E}[\|v_t^{s+1}\|^2]$

$$\begin{aligned} \mathbb{E}[\|v_t^{s+1}\|^2] &= \mathbb{E}[\|v_t^{s+1} - H_t^{s+1} + H_t^{s+1}\|^2] \\ &\leq 2\mathbb{E}[\|H_t^{s+1}\|^2] + 2\mathbb{E}[\|\xi_t^{s+1} - \mathbb{E}[\xi_t^{s+1}]\|^2] \\ &\leq 2\mathbb{E}[\|H_t^{s+1}\|^2] + 2\mathbb{E}[\|\xi_t^{s+1}\|^2], \\ &\leq 4\mathbb{E}[\|\nabla \log L(\theta_t^{s+1})\|^2] + 4\eta^2 + 2\mathbb{E}[\|\xi_t^{s+1}\|^2], \\ &\leq 4C\mathbb{E}[\|\nabla \log L(\theta_t^{s+1})\|^2] + 2\mathbb{E}[\|\xi_t^{s+1}\|^2], \end{aligned} \tag{58}$$

where  $\xi_t^{s+1} = \frac{1}{d_i} \{\nabla H_{i_t}(\theta_t^{s+1}, z_{i_t}) - \nabla H_{i_t}(\tilde{\theta}^s, z_{i_t})\}$  and  $\eta = \nabla H_t^{s+1} - \nabla \log L(\theta_t^{s+1})$  is the step error which is order of  $(m\gamma + \frac{1}{\sqrt{n_1 n}})$ . The last inequality above uses the fact that  $\|\nabla \log L(\theta_t^{s+1})\| = \Omega(\|\eta\|)$  before the termination of the

algorithm. Since,  $\|\eta\|$  can be bounded by

$$\begin{aligned}
 \|\eta\| &= \|\nabla H_t^{s+1} - \nabla \log L(\theta_t^{s+1})\| \\
 &= \|\nabla H(\theta_t^{s+1}) - \nabla H(\tilde{\theta}^s) + \nabla H_{B^s}(\tilde{\theta}^s) - \nabla \log L(\theta_t^{s+1})\| + O(\exp\{-c'd_{min}\}) \\
 &\leq \|\nabla H(\theta_t^{s+1}) - \nabla H(\tilde{\theta}^s)\| + \|\nabla H_{B^s}(\tilde{\theta}^s) - \nabla \log L(\tilde{\theta}^s|\mathbf{z}^*)\| \\
 &\quad + \|\nabla \log L(\tilde{\theta}^s|\mathbf{z}^*) - \nabla \log L(\theta_t^{s+1}|\mathbf{z}^*)\| \\
 &\quad + \|\nabla \log L(\theta_t^{s+1}|\mathbf{z}^*) - \nabla \log L(\theta_t^{s+1})\| + O(\exp\{-c'd_{min}\}) \\
 &\leq L\|\theta_t^{s+1} - \tilde{\theta}^s\| + O\left(\frac{1}{\sqrt{d_{min}|B^s|}}\right) \\
 &\quad + L\|\theta_t^{s+1} - \tilde{\theta}^s\| + O(\exp\{-c'd_{min}\}) + O(\exp\{-c'd_{min}\}) \tag{59}
 \end{aligned}$$

$$= O\left(m\gamma + \frac{1}{\sqrt{n_1 d_{min}}}\right). \tag{60}$$

Here, (59) uses the fact that  $\nabla H(\theta)$  and  $\nabla \log L(\theta|\mathbf{z}^*)$  are  $L$ -Lipschitz continuous for some  $L$  and  $\|\nabla \log H_{B^s}(\tilde{\theta}^s|\mathbf{z}^*) - \nabla \log L(\tilde{\theta}^s|\mathbf{z}^*)\|$  is  $O_p(1/\sqrt{d_{min}|B^s|})$  by using concentration inequality 5.

As a result, we can obtain

$$\begin{aligned}
 \langle \nabla \log L(\theta_t^{s+1}), H_t^{s+1} \rangle &\geq \langle \nabla \log L(\theta_t^{s+1}), \nabla \log L(\theta_t^{s+1}) \rangle - \langle \nabla \log L(\theta_t^{s+1}), \nabla \log L(\theta_t^{s+1}) - H_t^{s+1} \rangle \\
 &\geq \|\nabla \log L(\theta_t^{s+1})\|^2 - \|\nabla \log L(\theta_t^{s+1})\| \|\nabla \log L(\theta_t^{s+1}) - H_t^{s+1}\| \\
 &\geq c\|\nabla \log L(\theta_t^{s+1})\|^2, \tag{61}
 \end{aligned}$$

when  $\|\nabla \log L(\theta_t^{s+1})\| = \Omega\left(m\gamma + \frac{1}{\sqrt{n_1 d_{min}}}\right)$  before the termination of the algorithm.

Under the network setting, we can similarly construct the Lyapunov function as

$$R_t^{s+1} := \mathbb{E}[F(\theta_t^{s+1}) + c_t\|\theta_t^{s+1} - \tilde{\theta}^s\|^2],$$

with  $c_t$ 's satisfying recursive relationship  $c_t = c_{t+1}(1 + \gamma\beta + 2\gamma^2 L^2) + \gamma^2 L^3$  ( $t = 0, \dots, m-1$ ) and  $c_m = 0$ . By the same procedure, we then arrive at

$$\frac{1}{T} \sum_{s=0}^{T-1} \sum_{t=0}^{m-1} \mathbb{E}[\|\nabla F(\theta_t^{s+1})\|^2] \leq C \frac{R_0^0 - R_m^T}{\gamma m T} \leq C \frac{F(\theta^0) - F(\theta^*)}{\gamma m T} \tag{62}$$

holds for some constant  $C$ . This leads to the desire result and concludes the proof of Theorem 5.

Finally, we set  $n_1 = n^{2(\alpha-\alpha_1)}/d_{min}$ ,  $m = n^{\alpha_1}$ ,  $\gamma = n^{-\alpha}$ . Then the total computational complexity will be

$$(md_{max} + n_1 d_{max}) \frac{C}{\gamma m \epsilon}. \tag{63}$$

Suppose  $d_{min}, d_{max} \approx n^{\alpha_0}$ , then we can choose  $\alpha_1 = \frac{2\alpha-\alpha_0}{3}$ . Then  $n_1 = n^{(2\alpha-\alpha_0)/3}$  and computational complexity becomes  $n^{\alpha+\alpha_0} \frac{C}{\epsilon}$ , where  $\alpha$  should satisfy  $\alpha < 1$  and  $2(\alpha - \alpha_1) > \alpha_0$  (i.e.,  $\alpha > \alpha_0/2$ ).

## References

Sashank J. Reddi, Ahmed Hefny, Suvrit Sra, Barnabás Póczos, and Alexander J. Smola. Stochastic variance reduction for nonconvex optimization. In *Proceedings of the 33rd International Conference on Machine Learning (ICML)*, pages 314–323, New York City, NY, 2016.

R Tyrrell Rockafellar. *Convex Analysis*, volume 36. Princeton university press, 1970.

Lin Xiao and Tong Zhang. A proximal stochastic gradient method with progressive variance reduction. *SIAM Journal on Optimization*, 24(4):2057–2075, 2014.
